# Supplementary material for: Effect of Prewarming during Induction of Anesthesia on Microvascular Reactivity in Patients Undergoing Off-Pump Coronary Artery Bypass Surgery: A Randomized Clinical Trial
Source: PubMed Central journal article supplement (PMC4956040; doi:10.1371/journal.pone.0159772), 2016-07-21
Supplement: pone.0159772.s003.pdf [file pone.0159772.s003.pdf]

ClinicalTrials.gov PRS **DRAFT Receipt (Working Version)**  
Last Update: 01/12/2016 21:07

ClinicalTrials.gov ID: NCT02186210

---

## Study Identification

Unique Protocol ID: Prewarming\_OPCAB  
Brief Title: Effect of Prewarming on Microcirculatory Response  
Official Title: Effect of Prewarming on Microcirculatory Response  
Secondary IDs:

## Study Status

Record Verification: August 2014  
Overall Status: Completed  
Study Start: July 2014  
Primary Completion: May 2015 [Actual]  
Study Completion: May 2015 [Actual]

## Sponsor/Collaborators

Sponsor: Seoul National University Hospital  
Responsible Party: Sponsor  
Collaborators:

## Oversight

FDA Regulated?: No  
IND/IDE Protocol?: No  
Review Board: Approval Status: Approved  
Approval Number: H-1306-026-496  
Board Name: Seoul National University Hospital Institutional Review Board  
Board Affiliation: Seoul National University Hospital  
Phone: 82-2-2072-0694  
Email: snuhirb@gmail.com  
Data Monitoring?: Yes  
Plan to Share Data?:  
Oversight Authorities: South Korea: Korea Food and Drug Administration (KFDA)

## Study Description

**Brief Summary:** Intraoperative hypothermia may affect tissue microcirculation and can induce myocardial injury, wound infection, and coagulopathy. During off-pump coronary artery bypass surgery without cardiopulmonary bypass or induced hypothermia, maintenance of normothermia is important for clinical outcome. The investigators hypothesized that prewarming during induction of general anesthesia would reduce drop of body temperature and change of peripheral microcirculation.

**Detailed Description:** Microcirculatory parameters can be obtained from vascular occlusion test. Among those parameters, recovery slope during vascular occlusion test is known to reflect recruitment of microvasculature in response to hypoxic or ischemic insult. In this study, we will compare the recovery slope during vascular occlusion test between prewarming treatment group and control group.

## Conditions

**Conditions:** Coronary Artery Bypass Graft Triple Vessel

**Keywords:** microcirculation  
off-pump coronary artery bypass surgery  
tissue oxygen saturation  
vascular occlusion test  
recovery slope

## Study Design

**Study Type:** Interventional

**Primary Purpose:** Treatment

**Study Phase:** N/A

**Intervention Model:** Parallel Assignment

**Number of Arms:** 2

**Masking:** Double Blind (Subject, Caregiver, Investigator)

**Allocation:** Randomized

**Endpoint Classification:** Efficacy Study

**Enrollment:** 40 [Actual]

## Arms and Interventions

| Arms                                                                     | Assigned Interventions                                                                                                                      |
|--------------------------------------------------------------------------|---------------------------------------------------------------------------------------------------------------------------------------------|
| Experimental: prewarming<br>prewarming during induction of anesthesia    | Device: prewarming<br>recovery slope StO2<br>Other Names: <ul style="list-style-type: none"><li>• prewarming by active air heater</li></ul> |
| No Intervention: control<br>no prewarming during induction of anesthesia |                                                                                                                                             |

## Outcome Measures

**Primary Outcome Measure:**

1. recovery slope

[Time Frame: 3 hours after induction of anesthesia] [Safety Issue: Yes]

We will compare recovery slope assessed 3 hours after induction of anesthesia to evaluate the effect of prewarming during induction of anesthesia on microcirculation.

Secondary Outcome Measure:

2. tissue oxygen saturation

[Time Frame: 3 hours after induction of anesthesia] [Safety Issue: No]

## Eligibility

Minimum Age: 20 Years

Maximum Age: 85 Years

Gender: Both

Accepts Healthy Volunteers?: No

Criteria: Inclusion Criteria:

- off-pump coronary artery bypass surgery

Exclusion Criteria:

- refuse to enroll
- cannot undergo vascular occlusion test: anatomical abnormality of both arms, severe peripheral vascular disease, presence of A-V fistula
- preoperative left ventricular ejection fraction < 35%
- preoperative continuous infusion of vasopressor or inotropes
- pregnancy

## Contacts/Locations

Study Officials: Yunseok Jeon, PhD  
Study Principal Investigator  
Seoul National University Hospital

Locations: Korea, Republic of  
Seoul National University Hospital  
Seoul, Korea, Republic of, 110-744

Seoul National University Hospital  
Seoul, Korea, Republic of, 110-744

 NOTE : Facility 'Seoul National University Hospital' in 'Seoul, Korea, Republic of, 110-744' has been specified multiple times.

## References

Citations:

Links:

Study Data/Documents:
